# Supplementary material
Source: publisher figshare collection journal article supplement (https://tandf.figshare.com/articles/dataset/_/3112822)
Supplement: Supplementary file 3 [file 1]

Archive with 2 entries (2 files):
- igen_a_1136283_sm1725.pdf
- igen_a_1136283_sm8792.pdf
